# Supplementary material
Source: PubMed Central journal article supplement (PMC5922286)
Supplement: jciinsight-3-97881-s001.pdf [file jciinsight-3-97881-s001.pdf]

## Supplemental Materials

**Supplementary Table I. Flow Cytometric Analysis of MHC molecule expression on same-donor human ECs and PCs**

| <b>Cells</b> | <b>HLA-A,B,C</b> | <b>HLA-DR</b>    |
|--------------|------------------|------------------|
| EC           | 134 $\pm$ 17.93  | 0                |
| $\gamma$ -EC | 1424 $\pm$ 43.73 | 1076 $\pm$ 233.4 |
| PC           | 1040 $\pm$ 29.9  | 0                |
| $\gamma$ -PC | 1818 $\pm$ 196.8 | 527 $\pm$ 67.27  |

HLA-A,B,C and HLA-DR on same-donor human ECs and PCs were analyzed by flow cytometry. The results shown are the corrected median fluorescence intensity (MFI) expressed in arbitrary units of fluorescence  $\pm$  SEM [n=3 donor pairs].

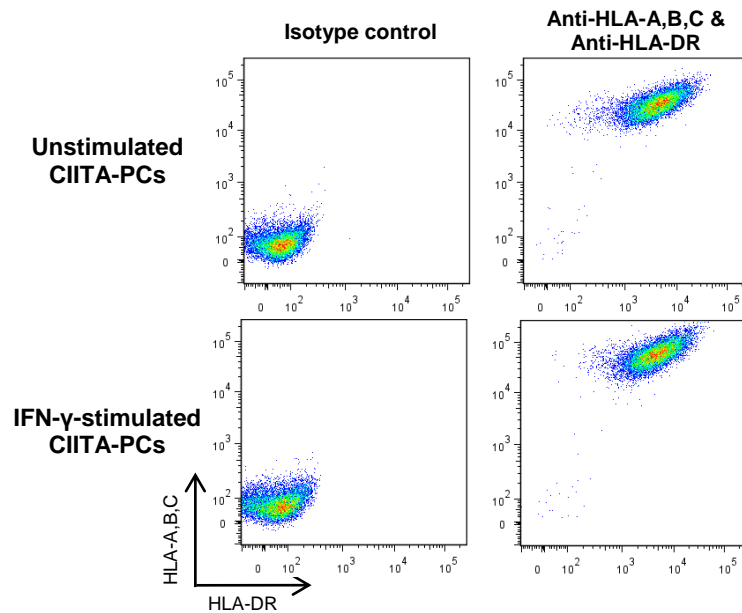

**Supplementary Figure 1. MHC Class I and Class II expression by unstimulated or IFN- $\gamma$ -stimulated CIITA-PCs.** CIITA-PCs were stimulated with vehicle or 50 ng/mL of IFN- $\gamma$  for 72 hours, and surface expression level of HLA-A,B,C and HLA-DR by these CIITA-PCs were assessed by flow cytometry. Representative results from one of the three PC donors were shown. Corrected median fluorescence intensity (MFI, expressed in arbitrary units of fluorescence)  $\pm$  SEM for HLA-A,B,C expression by unstimulated CIITA-PCs and IFN- $\gamma$ -stimulated CIITA-PCs are  $34018 \pm 1954$  and  $63964 \pm 5039$ , respectively. Corrected MFI for HLA-DR expression by unstimulated CIITA-PCs and IFN- $\gamma$ -stimulated CIITA-PCs are  $5153 \pm 131$  and  $5458 \pm 104.4$ , respectively.

A

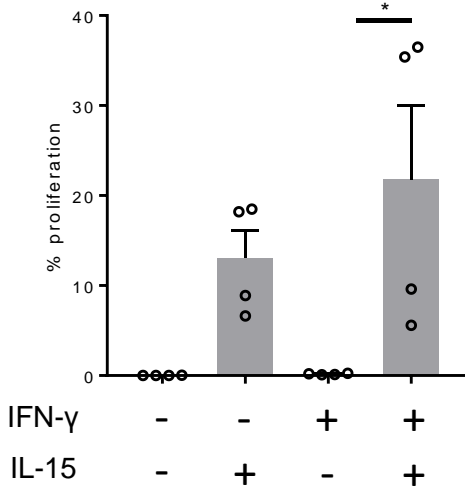

B

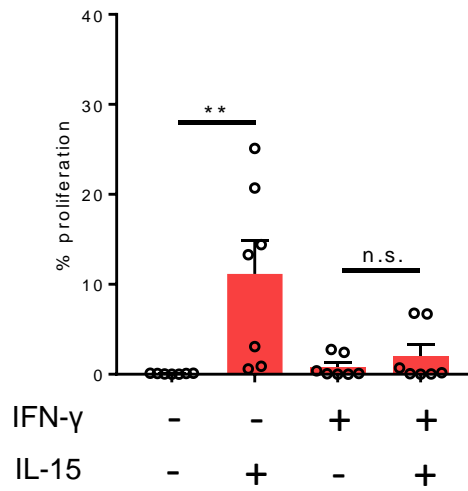

**Supplementary Figure 2.  $\gamma$ -PCs potently inhibit IL-15-induced CD8<sup>+</sup> T<sub>EM</sub> proliferation.** Proliferation of CFSE-labelled CD8<sup>+</sup> T<sub>EM</sub> after co-cultured with unstimulated or IFN- $\gamma$  pre-stimulated ECs (A) or PCs (B) for 7 days. 10ng/mL of recombinant IL-15 was added on day 3 of co-culture where indicated (n = 4–7, one-way ANOVA, SEM). \*p < 0.05, \*\*p < 0.01.

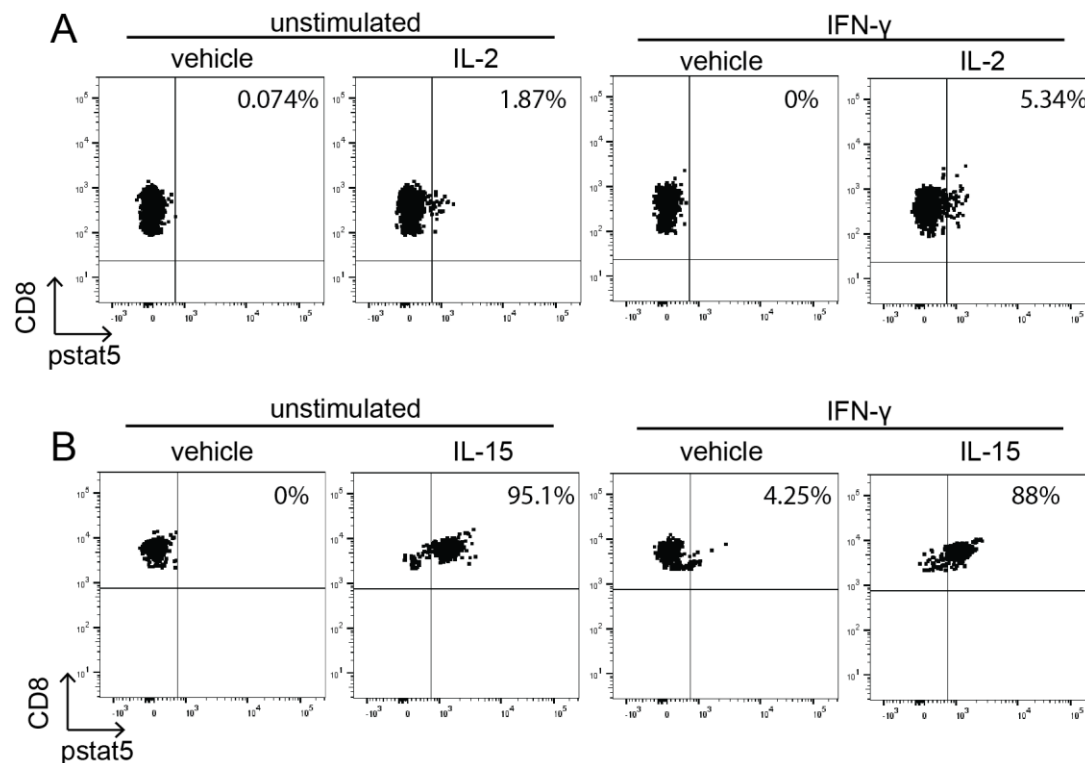

**Supplementary Figure 3. CD8<sup>+</sup> T<sub>EM</sub> co-cultured with  $\gamma$ -PCs phosphorylates STAT5 in response to common  $\gamma$  chain cytokines.** A) CD8<sup>+</sup> T<sub>EM</sub> were co-cultured with PCs or  $\gamma$ -PCs for 3 days, and then were stimulated with recombinant IL-2 (25u/mL) for 25 minutes before the status of STAT5 phosphorylation was assessed by flow cytometry. B) CD8<sup>+</sup> T<sub>EM</sub> were co-cultured with PCs or  $\gamma$ -PCs for 3 days, and then were stimulated with recombinant IL-15 (10ng/mL) for 25 minutes before the status of STAT5 phosphorylation was assessed by flow cytometry. Representative results from one of the three independent experiments were shown.

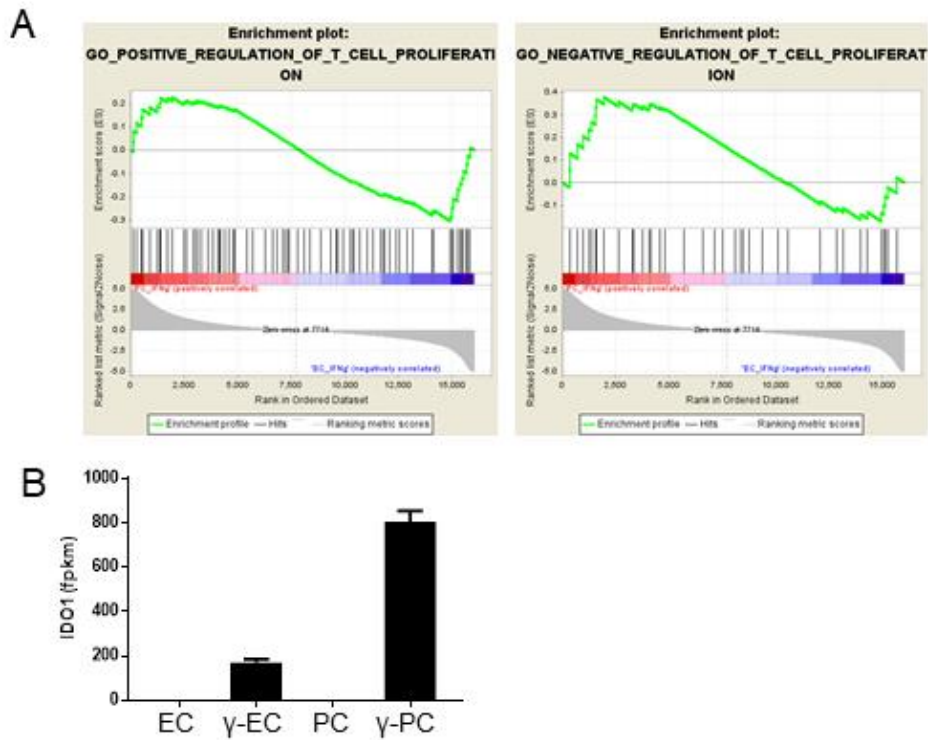

**Supplementary Figure 4. RNAseq analysis comparing transcriptome signatures of ECs,  $\gamma$ -ECs, PCs, and  $\gamma$ -PCs revealed distinct action of IFN- $\gamma$  on ECs versus PCs.** A) Gene set enrichment analysis using two selected gene sets relevant to T cell proliferation (*Positive Regulation of T cell Proliferation* and *Negative Regulation of T cell Proliferation*), showing their enrichment scores, where a positive score indicates enrichment (higher expression) in  $\gamma$ -PCs relative to  $\gamma$ -ECs. FDR=0.10 for both analyses. B) IDO1 transcript level expressed by EC,  $\gamma$ -EC, PC, and  $\gamma$ -PC. Data derived from the RNAseq analysis (bar graphs show mean  $\pm$  SEM of 3 replicates for each condition).

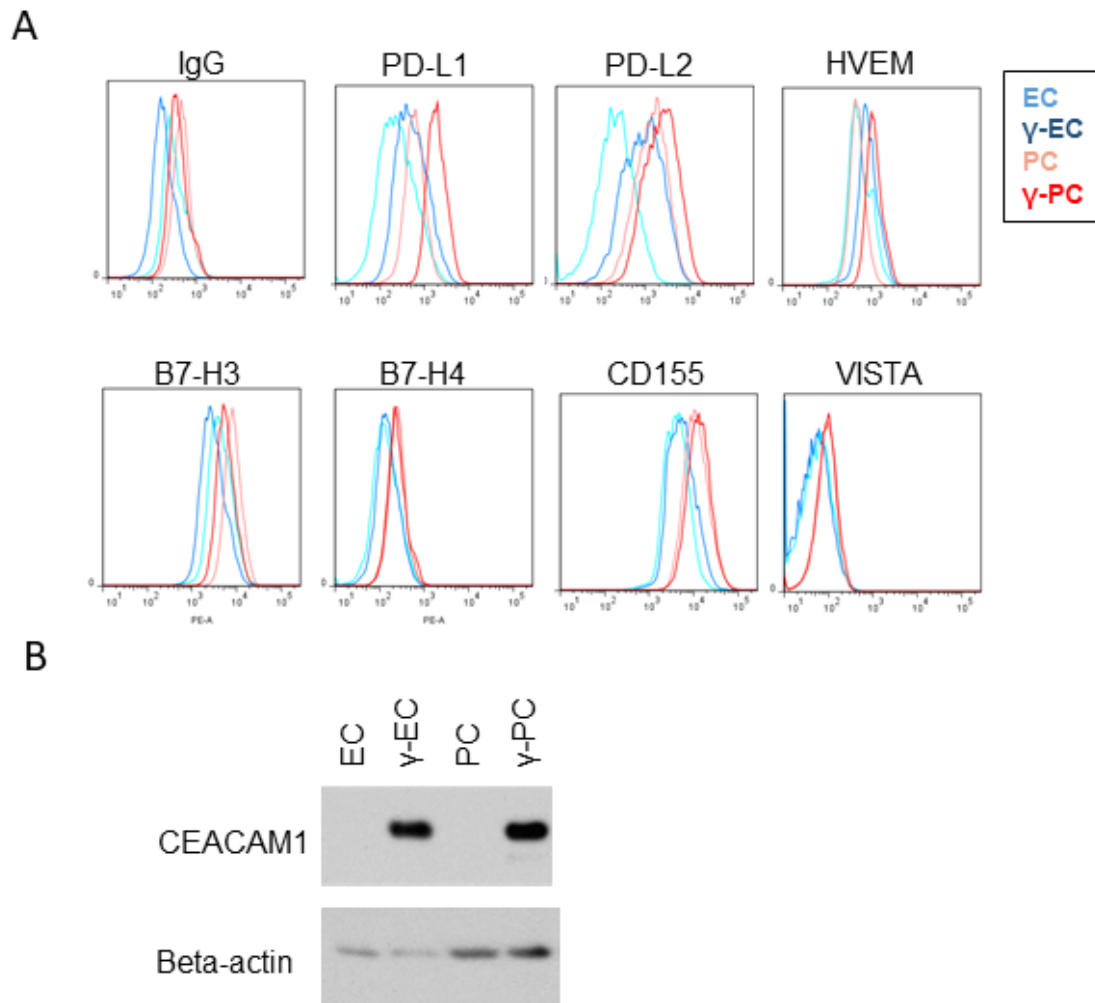

**Supplementary Figure 5. IFN- $\gamma$  induces expression of PD-1 ligands and CEACAM1 on ECs and PCs.** A) Representative FACS plot showing expression level of PD-L1, PD-L2, HVEM, B7-H3, B7-H4, CD155, and VISTA by unstimulated or IFN- $\gamma$ -stimulated ECs or PCs assessed by flow cytometry (n=3). B) Immunoblotting of CEACAM1 expressed by unstimulated or IFN- $\gamma$ -stimulated ECs or PCs (n=3).

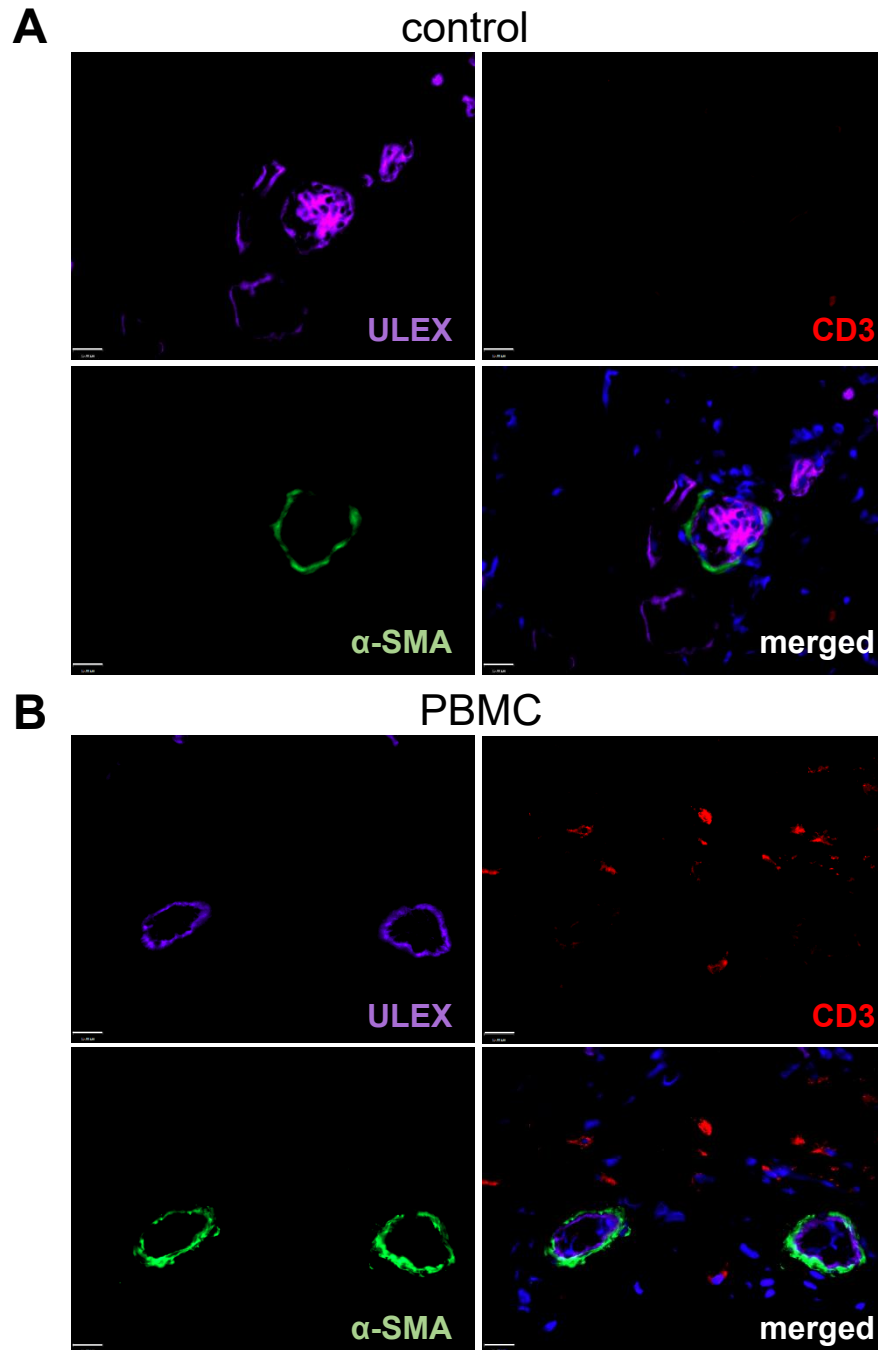

**Supplementary Figure 6. Perivascular infiltration of allogeneic human T cells in vivo in a skin allograft rejection humanized mouse model.** Immunofluorescence analysis of human skin allograft implanted on immunodeficient mice receiving control saline (A) or human PBMCs (B). Skin grafts were harvested on day 7 after injection. Freshly frozen tissues were co-stained for Ulex Europaeus Agglutinin I (ULEX), alpha-smooth muscle actin ( $\alpha$ -SMA), and CD3. Results shown are representative of three skin grafts. Scale bars = 16  $\mu$ m.

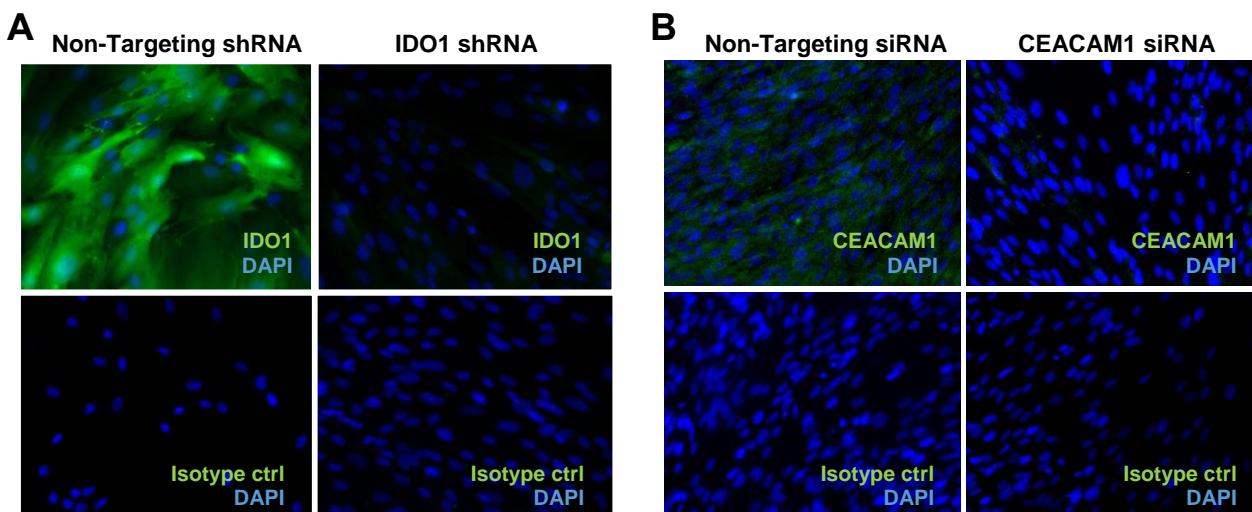

**Supplementary Figure 7. Validation of IDO1 and CEACAM1 antibody specificities for immunofluorescence staining.** A) Non-targeting or IDO1 shRNA PCs were stimulated with IFN- $\gamma$  (50ng/mL) for 72 hours, and then stained using IDO1 or rabbit IgG isotype control. B) Non-targeting or CEACAM1 siRNA PCs were stimulated with IFN- $\gamma$  (50ng/mL) for 72 hours, and then stained using CEACAM1 or mouse IgG isotype control.
